# Supplementary material for: Hydraulic Retention Time as an Operational Tool for the Production of Short-Chain Carboxylates via Anaerobic Fermentation of Carbohydrate-Rich Waste
Source: MDPI journal article supplement (doi:10.3390/molecules28186635), 2023-09-15
Supplement: s1 [file s1]

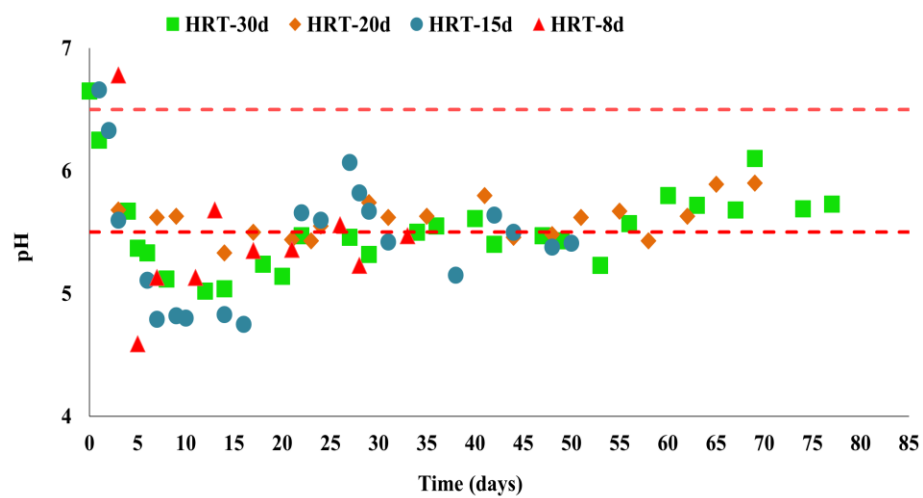

**Figure S1.** pH evolution throughout the experiment at the different HRTs. Red lines refer to the upper and lower suitable values for anaerobic fermentation aiming to produce SCFAs.
